1 **Title: Aberrant epigenetic and transcriptional events associated with breast cancer risk**

2 **Authors:** Natascia Marino<sup>1,2</sup>, Rana German<sup>1</sup>, Ram Podicheti<sup>3</sup>, Douglas B. Rush<sup>3</sup>, Pam Rockey<sup>1</sup>, Jie Huang<sup>3</sup>,  
3 George E. Sandusky<sup>4</sup>, Constance J. Temm<sup>4</sup>, Sandra K. Althouse<sup>5</sup>, Kenneth P. Nephew<sup>6</sup>, Harikrishna  
4 Nakshatri<sup>7</sup>, Jun Liu<sup>3</sup>, Ashley Vode<sup>1</sup>, Sha Cao<sup>5</sup>, Anna Maria Storniolo<sup>1,2</sup>

5  
6 <sup>1</sup>Susan G. Komen Tissue Bank at the IU Simon Comprehensive Cancer Center, Indianapolis, IN 46202, USA

7 <sup>2</sup>Department of Medicine, Indiana University School of Medicine, Indianapolis, IN 46202, USA

8 <sup>3</sup>Center for Genomics and Bioinformatics, Indiana University, Bloomington, IN 47405, USA

9 <sup>4</sup>Pathology and Laboratory Medicine, Indiana University School of Medicine, Indianapolis, IN 46202, USA

10 <sup>5</sup>Department of Biostatistics and Health Data Science, Indiana University School of Medicine, Indianapolis, IN  
11 46202, USA

12 <sup>6</sup>Department of Anatomy, Cell Biology, & Physiology, Indiana University, Bloomington, IN 47405, USA

13 <sup>7</sup>Department of Surgery, Indiana University School of Medicine, Indianapolis, IN 46202, USA  
14

15 **Running title:** Molecular profiling of breast from women at high cancer risk

16 \*Corresponding author: Natascia Marino, PhD; Department of Medicine, Hematology/Oncology Division;  
17 Indiana University School of Medicine; 980 W. Walnut St, R3-C238, Indianapolis, IN 46202; phone: (317)  
18 274-3340; email: [marinon@iu.edu](mailto:marinon@iu.edu)  
19

20 **Abstract:** 244; **Text:** 4,770 (including Background, Results Discussion and Methods); **Figures + Table:** 6;

21 **References:** 71; **Pages:** 31

22 **Conflict of interest statement:** The authors declare no potential conflicts of interest  
23

## 24 ABSTRACT

25 **Background:** Genome-wide association studies have identified several breast cancer susceptibility  
26 loci. However, biomarkers for risk assessment are still missing. Here, we investigated cancer-related molecular  
27 changes detected in tissues from women at high risk for breast cancer prior to disease manifestation.

28 Disease-free breast tissue cores donated by healthy women (N=146, median age=39 years) were processed for  
29 both methylome (MethylCap) and transcriptome (Illumina's HiSeq4000) sequencing. Analysis of tissue  
30 microarray and primary breast epithelial cells was used to confirm gene expression dysregulation.

31 **Results:** Transcriptomic analysis identified 69 differentially expressed genes between women at either high and  
32 those at average risk of breast cancer (Tyrrer-Cuzick model) at FDR<0.05 and fold change $\geq$ 2. The majority of  
33 the identified genes were involved in DNA damage checkpoint, cell cycle, and cell adhesion. Two genes,  
34 FAM83A and NEK2, were overexpressed in tissue sections (FDR<0.01) and primary epithelial cells ( $p$ <0.05)  
35 from high-risk breasts. Moreover, 1698 DNA methylation aberrations were identified in high-risk breast tissues  
36 (FDR<0.05), partially overlapped with cancer-related signatures and correlated with transcriptional changes  
37 ( $p$ <0.05,  $r\leq$ 0.5). Finally, among the participants, 35 women donated breast biopsies at two time points, and age-  
38 related molecular alterations enhanced in high-risk subjects were identified.

39 **Conclusions:** Normal breast tissue from women at high risk of breast cancer bears molecular aberrations that  
40 may contribute to breast cancer susceptibility. This study is the first molecular characterization of the true  
41 normal breast tissues and provides an opportunity to investigate molecular markers of breast cancer risk, which  
42 may lead to new preventive approaches.

43  
44 **Keywords:** Cancer risk, transcriptome, DNA methylation, normal breast

## 47 BACKGROUND

48 Genetic and epigenetic alterations in breast cancer (BC) have been widely investigated. However, when, during  
49 the carcinogenesis process, these events first emerge remains unknown. The identification of molecular  
50 aberrations associated with BC development can provide a conceptual framework for a deeper understanding of  
51 this complex disease.

52  
53 Genome-wide association studies (GWAS) have detected more than 170 genomic loci harboring common  
54 variants associated with BC risk including modifier alleles with high (e.g., BRCA1, BRCA2, TP53, PTEN) to  
55 moderate penetrance (e.g., BRIP1, CHEK2, ATM, and PALB2) (1-4). Nevertheless, many variants are located  
56 in noncoding or intergenic regions and their functional role in cancer transformation remains largely unknown.  
57 Recently, transcriptome-wide association studies were used to integrate GWAS and gene expression datasets  
58 and identified 154 genes whose predicted expression associated with the risk for BC (5-9). However, these  
59 studies drew data from the Genotype-Tissue Expression (GTEx) project, where the use of autopsy-derived  
60 normal breast tissues may make the breast-specific transcriptome profilings questionable. The relative lack of  
61 molecular profiling of normal breast tissue from subjects who are disease-free makes the field challenging.

62  
63 Many studies searching for cancer biomarkers have identified gene expression signatures, epigenetic signatures,  
64 loss of heterozygosity and allelic imbalance resulting from the development of malignancy (10). Among the  
65 molecular processes linked with cancer, DNA methylation has a key role in early cancer development through a  
66 process known as epigenetic reprogramming (11), potentially leading to silencing and loss of expression of  
67 tumor suppressor genes (12), and genomic instability (13).

68  
69 Here, we performed an integrated analysis of DNA methylation and transcriptome profiling of cancer-free  
70 breast tissues donated by healthy women at either average or high risk for BC. In addition to early epigenetic  
71 events, we identified two molecules overexpressed in high-risk breasts independently from DNA methylation  
72 changes and, therefore, potential markers of BC susceptibility. Moreover, using a subcohort of repeated breast

tissues donation by the same donors, we confirmed that the molecular changes identified in high-risk subjects are age-independent. These findings will lead to a deeper understanding of BC susceptibility and also provide the scientific community with the molecular profiling of a true normal breast tissue.

## RESULTS

### Study cohort used to investigate molecular aberrations in association with breast cancer (BC) risk

To identify transcriptomic and epigenetic differences linked with BC risk, we analyzed cancer-free breast tissue cores donated by 146 healthy women (median age: 39 years) including 112 Caucasian, 24 African American and 10 Asian subjects (**Additional File 1: Table S1**). Out of 146 participants, 117 were pre- and postmenopausal women. Tyrer-Cuzick model was employed to estimate the lifetime risk of developing BC and allocated the subjects to either high- (score $\geq$ 20%, N=68) or average-risk group (score $<$ 20%, N=78) (**Fig. 1A, Table 1 and Additional File 1: Table S1**).

### Characterization of the transcriptome alterations in high-risk breast

We performed a transcriptome analysis of the fresh frozen disease-free breast tissue donated by all the participants. Differential expression analysis was performed using DESeq2. From a total of 22,344 genes, the differential expression analysis between high- and average-risk breasts revealed 1,874 transcripts to be significant at 5% false discovery rate (FDR). Of these, 1,798 transcripts also passed the cutoff of *t*-test *p*-value  $\leq$  0.05 (**Additional File 1: Table S2**). Sixty-nine genes, including 51 upregulated and 18 downregulated genes, were identified with a fold change  $\geq$  2 (**Table 1**). Because both groups consisted of non-malignant breast tissue, a limited number of differentially expressed genes was expected (14). Canonical pathway analysis revealed enrichment in pathways related to kinetochore signaling ( $p=1.3E-05$ ), DNA damage checkpoint ( $p=0.0005$ ), granulocytes adhesion ( $p=0.002$ ), and the IL17 pathway ( $p=0.004$ ) (**Figure 1B, Additional File 1: Table S3**). Our data further confirm the previously described impact of dysregulated DNA damage in breast carcinogenesis (15). Molecular network analysis showed an enrichment in functional categories involved in cell cycle, DNA

replication and repair (**Figure 1C, Additional File 1: Table S3**). One of the major molecular networks regulating cell cycle is centered around AKT and the transcription factor FOXM1 (16). Except for DCX, the transcriptional changes detected between high- and average-risk breasts listed in Table 2 are independent of both racial background and menopausal status of the tissue donors (**Additional File 1: Table S4 and Additional File 2: Fig. S1**).

Among the 69 differentially expressed genes, FAM83A and NEK2, showed the highest gene amplification rate (number of cases with gene amplification >200) and genetic alteration frequency (>10%), as well as overexpression in BC ( $p > 0.001$ ) and Oncoscore >50, as detected through METABRIC database, cBioportal, UALCAN and Oncoscore analyses FAM83A and NEK2 (**Table 1 and Additional File 2: Fig. S2**) (17-19). The expression of FAM83A and NEK2 in the breasts of high- and average-risk women is shown in **Fig. 1D**. We detected a 4.5-fold increase in FAM83A and 2.2-fold increase in NEK2 expression in primary epithelial cells isolated from the breast of high-risk women when compared with cells isolated from breast tissue of average-risk women (**Fig. 1E**). Overexpression of both targets was detected also in a dataset of hTERT-immortalized epithelial cells as compared with the isogenic primary cells (20) (**Fig. 1F**). Moreover, immunostaining of a breast tissue microarray showed a 1.4 fold increase in FAM83A protein levels in the breast tissues from women at high risk of BC as compared with the breast tissues from subjects at average risk ( $p < 0.0001$ , **Fig. 1G, Additional File 2: Fig. S3A and Additional File 1: Table S5**). FAM83A overexpression in normal breast tissues was associated with parity ( $p < 0.001$ ), tobacco use ( $p = 0.01$ ) and family history of BC ( $p = 0.02$ ) (**Additional File 1: Table S6**). On the contrary, NEK2 staining showed no difference in protein levels between the two groups (**Fig. 1G**). No difference in Ki67, estrogen receptor alpha (ER $\alpha$ ), FOXA1 and GATA3 staining between high- and average-risk breasts was observed (**Additional File 2: Fig. S3B and Additional File 1: Table S5**). This data shows that FAM83A expression changes are specific to breasts of women at high risk of developing breast cancer.

## Genome-wide DNA methylation analysis reveals 1698 aberrant DNA methylation sites in normal breast tissue of high-risk women

With the goal of identifying alterations in regulatory regions leading to BC susceptibility, we performed a methylome analysis using the MethylCap-seq approach. Differential analysis of the methylated regions detected in the breasts from average-risk women and those from women at high risk of cancer revealed a wide chromosomal distribution of the epigenetic aberrations (**Fig. 2A**). DNA methylation changes with a  $\Delta Z \geq 1$  (hypermethylated) or  $\leq -1$  (hypomethylated) were selected. We identified 1698 regions methylated that differentiate the breast tissue of high-risk women from that of women at average risk ( $FDR \leq 5\%$ ), mapping to 1115 unique genes (**Additional File 1: Table S7**). The twenty most hypermethylated and hypomethylated regions are shown in **Fig. 2B** and **Table 2**. Interindividual variability in DNA methylation can be observed within each experimental group. 98.9% of the DNA methylation aberrations consisted of hypermethylated loci ( $p = 9 \times 10^{-8}$ ; **Fig. 2C**). More than 90% of hypermethylated loci localized in regulatory regions including the promoter, untranslated region, and introns, while only 41% of hypomethylated loci localized in these regions (**Fig. 2C**). However, hypomethylated regions were localized predominantly in the gene body (59%), a phenomenon that has been linked with the activation in cancers of aberrant intragenic promoters that are normally silenced (21, 22).

Pathway analysis revealed the involvement of cell adhesion (aka synaptogenesis,  $p = 1.2E-06$ ), ErbB ( $p = 3.7E-04$ ) and protein kinase A ( $p = 4.8E-04$ ) signaling pathways (**Fig. 2D**, **Additional File 1: Table S8**). Notably, one of the molecular networks showed ESR2 as the central molecule (**Fig. 2E**). Although ESR2 expression decreased in high-risk breasts (fold change=0.82), the intronic ESR2 hypermethylation showed no inverse correlation with ESR2 expression ( $r = -0.03$ ,  $p = 0.4$ ; **Additional File 2: Fig. S4A-C**). One of the hypomethylated genes, MUC1 ( $\Delta Z = 1.4$ ,  $FDR = 1.6E-17$ ) is reported to be aberrantly overexpressed in over 90% of breast tumors (23, 24) (**Additional File 2: Fig. S4D**). However, no significant difference in MUC1 expression was observed between high- and average-risk breasts (**Additional File 2: Fig. S4E**). In the analyzed

cohort, DNA methylation was not highly affected by either racial background or menopausal status of the tissue donors (FDR>0.05; **Additional File 1: Table S9**). Finally, we found overlap between DNA methylation aberrations in high-risk breasts and breast cancer-related DNA methylation signatures such as those identified by Saghafeinia *et al* (4%, 25/666, (25)), Chen *et al* (6%, 10/174, (26)), de Almeida *et al* (9%, 25/285, (27)), and Xu *et al* (9%, 37/414, (28)) (**Additional File 1: Table S10**).

### **DNA methylation and gene expression changes in high-risk breast show a weak correlation**

To identify potential epigenetically regulated genes linked with BC risk, we performed a Pearson's correlation test on paired DNA methylation and gene expression data (**Fig. 3**). Among the 69 genes in **Table 2**, the expression of eight genes was associated with aberrant intronic DNA methylation, including six genes showing a direct correlation (APELA, DIO2, FEZF2, LPAR3, UNC5D and PRSS51) and two genes (PROK2, and SULT1C2) with a negative correlation (**Fig. 3A**). Furthermore, among the DNA methylation aberrations in **Table 2**, only the intronic hypermethylation of PHACTR1 ( $\Delta Z = 1.88$ , FDR= 1.0E-31) was negatively correlated with PHACTR1 expression (fold change=0.77, FDR=0.006,  $r=-0.21$ ) (**Fig. 3B**). However, the correlations identified were weak ( $r: -0.2, -0.5$ ) suggesting that other regulator events (chromatin modifications, gene amplification, nucleotide variants), rather than DNA methylation aberrations, may be the determinants of the transcriptomic changes observed in the high-risk breasts as compared with average-risk breasts.

### **Age-related molecular changes in cancer-free breast tissues in relation with cancer risk**

Age is the strongest demographic risk factor for most human malignancies, including breast cancer. Age-related transcriptome and DNA methylation aberrations were investigated on breast tissues cores donated by 35 women at two separate time points (**Additional File 1: Table S11**). Differential expression analysis (FDR<0.05) between the two donation time points revealed the dysregulation of 317 genes involved in LXR/RXR activation ( $p=7E-04$ ), immune response ( $p=2E-03$ ) and senescence ( $p=7E-03$ ) (**Additional File 1: Tables S12 and S13**). Forty-eight age-related transcriptomic changes with a fold change (fc) $\geq 2$  and FDR <0.05 included two upregulated genes, CETP (fc:2.4;FDR=0.04) and HP (fc=2.3, FDR=0.03); and downregulation of

59 five genes, SLC5A1 (fc=0.4; FDR=0.03), SLCO1A2 (fc=0.4; FDR=0.03), GRIA4 (fc=0.4; FDR=0.01),  
70 IL22RA2 (fc=0.4; FDR= 0.01), and CHRM1 (fc=0.4; FDR=0.03) (**Additional File 2: Fig. S5**). Furthermore,  
71 age-dependent dysregulation of the following five genes was enhanced in breast tissues from high-risk women:  
72 NEURL1, USP50, GRIA4, SPDEF and DNMT3 (**Fig. 4A**). Notably, the expression of GRIA4 ( $r=-0.43$ ,  $p=0.04$ )  
73 and DNMT3 ( $r=-0.47$ ,  $p=0.03$ ) showed a negative correlation with their DNA methylation pattern, thus  
74 suggesting a potential epigenetic regulation for these two molecules (**Fig. 4B**).

75 Age-dependent DNA methylation aberrations affected 301 loci corresponding to 280 unique transcripts  
76 (**Additional File 1: Table S14**). As previously reported (29), age-related DNA methylation alterations were  
77 predominantly hypermethylation events (85.4%) and affected the intronic regions (**Fig. 4C**). DNA methylation  
78 measurements were previously used to develop epigenetic biomarkers of aging, otherwise known as “DNA  
79 methylation age” or the “epigenetic clock” (30, 31). We observed a limited overlap between the 301 DNA  
80 methylation aberrations and the epigenetic clocks described by Horvath *et al* (1.4%, (31)) , while 73 genes  
81 associated with the bin in our dataset overlapped with age-associated DNA methylation alterations reported by  
82 Johnson *et al* (24.2%,(29)) (**Fig. 4D**). Finally, we identified age-related DNA methylation aberrations enhanced  
83 in high-risk breasts, localized on four genes: PTPRM, SPOCK1, KCNH1, and CFAP43. ( $p<0.001$ , **Fig. 4E and**  
84 **Additional File 1: Table S14**). In contrast, both transcriptomic and DNA methylation aberrations affecting  
85 FAM83A and NEK2 resulted age-independent.

## 37 DISCUSSION

38 This study aimed to define the distinct features of cancer-free breast tissues from women at high risk for  
39 BC and, thus, identify molecular markers that could potentially screen for women susceptible to cancer. We  
40 conducted transcriptome and methylome analyses using breast tissue cores donated by healthy women. The  
41 participants were divided into two cohorts based on their risk of developing breast cancer, according to the  
42 Tyrer-Cuzick lifetime risk assessment score: high-risk ( $\geq 20\%$ ) and average-risk ( $< 20\%$ ) (32). Among the genes  
43 upregulated in high-risk breast, we identified two promising markers of BC susceptibility, FAM83A and NEK2.



34 Furthermore, when investigating DNA methylation aberrations in high-risk breasts, we detected 4-10% overlap  
35 with cancer-related signatures.

36 Our transcriptomic analysis of high- and average-risk breasts revealed significant changes in 69 genes  
37 (FDR<0.05). Pathway analysis suggested the activation of cell cycle and cell adhesion in the high-risk breasts.  
38 Furthermore, one of the molecular networks including the differentially expressed genes showed the  
39 involvement of FOXM1 signaling. FOXM1 itself is upregulated 1.6 fold in high-risk breasts ( $p=0.001$ ). The  
40 transcription factor FOXM1 regulates the transcription of cell-cycle genes essential for exit from the G1/S  
41 phase into the G2/M phase such as cyclin A2, JNK1, ATF2 and CDC25A phosphatase as well as genes critical  
42 for chromosome segregation and cytokinesis (33). FOXM1 is overexpressed and plays critical role in  
43 tumorigenesis, metastasis, and drug resistance in a broad range of human cancer types, such as lung, gastric, and  
44 breast cancers (16). Compounds targeting FOXM1 expression or activity are under investigation (16). Our  
45 results suggest that the transcriptional dysregulation detected in high-risk breasts may be driven by FOXM1.

46 Two genes, FAM83A and NEK2, both upregulated in high-risk breast, showed a high Oncoscore (75.5  
47 and 61.4, respectively), and have been reported amplified in breast cancer. FAM83A is the smallest member of  
48 the eight-member FAM83 family of proteins that share a conserved amino-terminal Domain of Unknown  
49 Function (DUF1669 domain) (34). It was identified based on its transforming potential (35-37). FAM83A  
50 upregulation has been detected in multiple human tumor types, including breast, lung, pancreatic and cervical  
51 cancer (37-44). Lee *et al* (45, 46) revealed the ability of FAM83A to confer resistance to epidermal growth  
52 factor receptor/ tyrosine kinase inhibitors (EGFR-TKIs) through interactions with c-RAF and PI3K p85 in  
53 breast cancer. The authors also showed that BC patients with high FAM83A expression had a worse prognosis.  
54 FAM83A depletion suppressed proliferation and invasiveness *in vitro* as well as tumor growth *in vivo* (36).  
55 Based on the aforementioned studies, FAM83A is considered a candidate oncogene and our findings suggest  
56 that FAM83A may be one of the first molecules dysregulated in cancer transformation. Our team is currently  
57 investigating the role of FAM83A in breast carcinogenesis. Moreover, our DNA methylation data, in agreement  
58 with previous literature, suggest that FAM83A overexpression is mainly driven by genomic amplification

rather than epigenetic regulation (47, 48). Additional studies such as deep whole genome sequencing of DNA from breast tissues of high-risk women are required to support this hypothesis.

The NIMA-related kinase 2 (NEK2) protein belongs to a family of serine/threonine kinases, which have a role in mitotic progression by initiating the separation of centrosomes (49). NEK2 overexpression was previously reported in BC as result of gene amplification (47, 50). NEK2 depletion blocks cell cycle progression and tumor cell growth, making it an ideal therapeutic target (51). Notably, FOXM1 is reported to both bind NEK2 promoter and interact with NEK2 directly (52, 53). Our study further suggests a role of NEK2 dysregulation in breast carcinogenesis. However, we did not observe changes in NEK2 protein levels in breast tissues of high-risk women suggesting a disconnect between mRNA and protein levels, which is not uncommon. Further investigation of the role of NEK2 in breast carcinogenesis is needed.

We observed DNA methylation changes in high-risk breasts, consisting mostly of hypermethylation (98.8%) in the intronic regions (88%). Previous studies reported aberrant hypermethylation in normal breast tissue adjacent to the tumor (54). Hypermethylation in specific gene promoters is indeed linked to carcinogenesis through transcriptional silencing of tumor suppressor genes or regulatory regions within the genome leading to dysregulation of cell growth, cancer initiation and progression (55-57). We identified a 4-10% overlap between methylome aberrations in high-risk breasts and previously reported cancer-related signatures (25-28). The limited overlap may be linked to the different technical approaches (Methyl-capture vs Infinium HumanMethylation450 array) but may also suggest that cancer-related epigenetic marks are newly acquired during cancer initiation rather than being imprinted into the genome. Although the expression epigenetic modifiers such as DNMTs remain unaffected, we detected the upregulation in high-risk breasts of HASPIN ( $fc=1.7$ ;  $FDR<0.005$ ), a serine/threonine kinase involved into the phosphorylation of the histone H3 during mitosis (58), suggesting that other genetic and epigenetic mechanisms rather than DNA methylation may drive the transcriptomic aberrations in high-risk breasts.

Age is the strongest demographic risk factor for most human malignancies, including BC (59). The limited size of our cohort (N=35) prevented us from subdividing the subjects by age at tissue donation.

14 Nevertheless, we identified age-related transcriptomic aberrations enhanced in high-risk breasts including  
15 GRIA4 and DNMT3, which resulted potentially epigenetically regulated. In terms of DNA methylation  
16 aberrations, we found a limited overlap between the age-related DNA methylation changes here identified and  
17 epigenetic clock from Hovarth *et al.* (31) (**Additional File 1: Table S14**). However, a 24.2% overlap of our  
18 dataset with age-related DNA methylation aberrations described by Johnson *et al.* (29) was detected. The  
19 limited overlap is probably due to the different platform used for DNA methylation detection (Infinium Human  
20 Methylation 450 array vs Methyl-Cap-seq) and the type of analysis (epithelium-specific deconvolution vs whole  
21 tissue)(29, 31). Notably, we identified specific age-related DNA methylation changes, located on PTPRM,  
22 KCNH1, SPOCK1, CFAP43 gene, enhanced in the high- versus average-risk breasts.

23 This study harbors some limitations: the relatively small sample size prevented us from investigating in  
24 details cancer-related variables such as racial background. The selection of normal breast tissue cores with high  
25 content in epithelial compartment limited the number of available samples (**Additional File 2: Fig. S6**).  
26 Outcome data for the women at high risk for BC is not available at this time; however, this cohort is under an  
27 ongoing annual medical follow up. Because of the faster processing time and smaller cost, we performed whole  
28 tissue analysis instead of the more epithelium-specific laser microdissection or single-cell analysis. This limits  
29 the compartment specificity of the data but generates a more comprehensive view of the molecular features of  
30 the entire breast tissue core. Further deconvolution analysis may overcome this limitation (60, 61).

## 31 **CONCLUSIONS**

32 The present study reveals transcriptomic and epigenetic aberrations linked with BC risk. Transcriptional targets  
33 potentially promoting cancer susceptibility were identified. The described investigation provides an avenue for  
34 deciphering the functional relevance of genes involved in BC development and a rich resource for further  
35 investigation.

## 36 **METHODS**

### 37 **Study cohorts**

Breast specimens were obtained from the Susan G. Komen Tissue Bank at the IU Simon Comprehensive Cancer Center (KTB) and donated voluntarily upon informed consent by healthy women. Subjects were recruited under a protocol approved by the Indiana University Institutional Review Board (IRB protocols number 1011003097 and 1607623663). Subject demographics and breast cancer (BC) risk factors were collected using a questionnaire administered by the KTB and summarized in **Additional File 1: Table S1, S5 and S11**. Breast tissue cores are collected by using a needle biopsy as previously described (14). The study cohort consisted of two groups: 1) For the transcriptome and methylome analyses, 146 women (median age: 39 years) were selected based on the lack of clinical and histological breast abnormalities and high content in breast epithelial compartment (cellularity>40%). Germline mutation status of the subjects was obtained from KTB. Data were retrieved from the LifeOmic's Precision Health Cloud platform (<https://lifeomic.com/products/precision-health-cloud/>). Nine established breast cancer-predisposition genes (BRCA1, BRCA2, PALB2, ATM, CHECK2, BARD1, RAD51C, RAD51D, CDH1) were evaluated for variants identified as "pathogenic" or "likely pathogenic" in the ClinVar database (<https://preview.ncbi.nlm.nih.gov/clinvar/>) (**Additional File 1: Table S1**) (2, 3).

Thirty-five of these 146 women, including 10 at high risk and 25 at average risk for BC, donated their breast tissue at two time points at intervals from 1-10 years (mean: 3.2) between the tissue donations (**Fig. 1A and Additional File 1: Table S11**). 2) In a second analysis, paraffin-embedded breast tissue blocks related to 395 healthy women were obtained from the KTB and used to generate tissue microarrays. The cohort included 287 Caucasian, 66 African American, 49 Asian, with age ranging from 18 to 61 (**Additional File 1: Table S5**).

### **Breast cancer risk assessment**

Lifetime risk of developing BC was estimated by using the Tyrer-Cuzick risk score (IBISv8) (32) and a threshold of 20% to separate high- ( $\geq 20\%$ ) from average-risk ( $< 20\%$ ) individuals. The Tyrer-Cuzick model was selected over the other risk estimation tools for its accuracy and inclusion of young subjects (62).

### **Tissue processing and nucleic acid extraction**

To limit stromal contamination, only breast tissue samples abundant in epithelial compartment (cellularity >40%) were selected and processed. Total DNA and RNA were isolated from fresh frozen breast tissue biopsies (80-1500mg) using AllPrep DNA/RNA/miRNA kit (Qiagen). Tissues were homogenized by using 2ml prefilled tubes containing 3mm zirconium beads (Benchmark Scientific, cat.# D1032-30), 350µl Lysis Buffer and 2-Mercaptoethanol, and BeadBug 6 homogenizer (Benchmark Scientific) in a cold room at the following conditions: 4000 rpm for 45 seconds was repeated twice with 90 seconds rest time. The concentration and quality of total RNA and DNA samples were first assessed using Agilent 2100 Bioanalyzer. A RIN (RNA Integrity Number) and DIN (DNA integrity number) of six or higher is required to pass the quality control.

### **Whole transcriptome analysis**

cDNA library was prepared using the TruSeq Stranded Total RNA Kit (Illumina) and sequenced using Illumina HiSeq4000. Data included 146 paired-end fastq sequence libraries (raw read length: 38 x 2). Reads were adapter trimmed and quality filtered using Trimmomatic ver. 0.38 (<http://www.usadellab.org/cms/?page=trimmomatic>) setting the cutoff threshold for average base quality score at 20 over a window of 3 bases. Reads shorter than 20 bases post-trimming were excluded. About 94% of the reads have both the mates passing the quality filters. Cleaned reads mapped to Human genome reference sequence GRCh38.p12 with gencode v.28 annotation, using STAR version STAR\_2.5.2b (63). Only samples with about 99% of the cleaned reads aligned to the genome reference. Differential expression analysis was performed using DESeq2 ver. 1.12.3 (<https://bioconductor.org/packages/release/bioc/html/DESeq2.html>). Counts table containing mapped read counts for each gene, to be used as input for DESeq2 was generated using featureCounts tool of subread package (<https://doi.org/10.1093/bioinformatics/btt656>). Alternatively, we ran *t*-tests comparing the normalized read counts for the set of replicates from High risk samples to those for the set of replicates from Average risk samples. The normalized read counts were obtained from the DESeq2 run described above. The *p*values from the *t*-test were corrected for multiple testing using Benjamini-Hochberg method.

## 17 DNA methylation analysis

18 Library was generated by using MethylCap Library Kit (Diagenode, Denville NJ, US) according to the  
19 manufacturer's protocols followed by single-end 75-bp sequencing on Illumina Nextseq4000. Internal controls  
20 and duplicate samples were used to account for any batch effect and technical artifact. The data comprises of  
21 146 paired end read libraries in FASTQ format. These libraries represent replicates for two samples - High risk  
22 (68 libraries) and Average risk (78 libraries). The libraries were sequenced across multiple runs and the  
23 combined read counts for each library were generated. Reads were adapter trimmed and quality filtered using  
24 Trimmomatic 0.38 (<http://www.usadellab.org/cms/?page=trimmomatic>) with the cutoff threshold for average  
25 base quality score set at 20 over a window of 3 bases. Reads shorter than 20 bases post-trimming were  
26 excluded. Approximately, 96% of the sequenced reads passed the quality filters to be considered "cleaned"  
27 reads. This quality control reduced the number of samples to 57 high- and 55 average-risk. Cleaned reads were  
28 mapped to Human genome reference GRCh38.p12 using BWA ver. 0.7.15 (64). Insert sequences were imputed  
29 from the concordantly mapped read pair alignments. More than 95% of the cleaned read pairs were  
30 concordantly mapped. A previously described differential methylation analysis using either Zratio or  $\Delta Z$  (65,  
31 66) was applied to the current methyl-capture dataset with a slight improvisation on the validation of the  
32 significance of differential methylation. For any given local bin of a given width on the genome, the method  
33 compares across samples, variation in deduplicated insert coverage distribution quantified as the bin's z-score  
34 with respect to a larger genome region containing the bin. For this analysis, we used local non-overlapping bins  
35 with a fixed width of 250 bp with their z-scores computed relative to 25KB regions. Z-score is the number of  
36 standard deviations by which the bin coverage varies from the larger region's mean coverage. A significant  
37 difference in Zscores, calculated as either as  $\Delta Z$  or Zratio between the samples would indicate potential  
38 differential methylation for that bin, as previously described (67),. The analysis identified 159,438 bins, each  
39 250bp wide, to be potentially differentially methylated between High risk and Average risk samples with z-  
40 ratios or  $\Delta Z$  significant at 5% FDR and  $p$ -values from t-test  $\leq 0.05$ . Based on positional overlap, these bins were  
41 annotated using annotation from gencode v28.

## **Data analysis**

Ingenuity Pathways Analysis (IPA, Qiagen, Redwood City, CA) was used for canonical pathway and molecular network analyses (68). Publicly available transcriptomic data from primary and immortalized breast epithelial cells were obtained from GEO (<https://www.ncbi.nlm.nih.gov/geo/query/acc.cgi?acc=GSE108541>) (20). Analysis of The Cancer Genome Atlas (TCGA) was performed by interrogating both cBioPortal (<https://www.cbioportal.org/>) and UALCAN (<http://ualcan.path.uab.edu/>) databases (69). Copy number variations (CNV) analysis was obtained from the interrogation of the Molecular Taxonomy of Breast Cancer International Consortium, METABRIC (17, 18). Oncoscore was used to rank genes according to their association with cancer, based on the available scientific literature (<http://www.galseq.com/next-generation-sequencing/oncoscore-software/>; accessed on 3/31/2021) (19).

## **Primary breast epithelial cells and immunofluorescence**

Primary breast epithelial cells were generated from cryopreserved breast tissue cores obtained from the KTB as previously described (14, 20). Immunofluorescence staining was performed as previously described (14). Briefly, 5,000 cells were cultured overnight into each well of an 8 well-chamber slide (BD Biosciences, San Jose, CA) and fixed with acetone: methanol (1:1) at -20°C for 10 min. After washing and blocking (PBS1X, 5% normal goat serum, 0.1% TritonX-100) steps cells were incubated with primary either rabbit anti-vimentin (Cell Signaling, D21H3, 1:100) or mouse anti-E-cadherin (Cell Signaling, 14472, 1:50) overnight. Upon three washes with PBS, cells were incubated with secondary antibodies (goat anti-mouse Alexa Fluor 568 or goat anti-rabbit Alexa Fluor 488; Thermo Fisher Scientific, 1:500) for 1 h at room temperature. After three washes with PBS, the coverslide was mounted using DAKO fluorescent mounting medium (S3023 Agilent, Santa Clara, CA) and the staining was visualized using a fluorescent microscope (Eclipse TS100, Nikon Instruments inc, Melville, NY).

## **Quantitative real time polymerase chain reaction (qPCR)**

Total RNA was extracted from cells using AllPrep DNA/RNA/miRNA kit (Qiagen). Reverse transcription was performed using SuperScript™ IV VILO™ Master Mix (Invitrogen cat#: 11756050)

57 according to the manufacturer's instructions. qPCR was performed using the TaqMan™ Universal PCR Master  
58 Mix (Applied Biosystems, cat# 4304437) and the following TaqMan Gene Expression Assays (Applied  
59 Biosystems/Thermo Fisher Scientific, Grand Island, NY): ACTB (Hs99999903\_m1), FAM83A  
60 (Hs04994801\_m1), and NEK2 (Hs00601227\_m1). qPCR reactions were run on a StepOne Plus Real-Time PCR  
61 System (Applied Biosystems/Thermo Fisher Scientific) and data analyzed using the StepOne Software v2.3  
62 (Applied Biosystems). Relative quantification was calculated with reference to ACTB and analyzed using the  
63 comparative  $C_T$  method. qPCR experiments were performed in triplicate.

#### 64 **Tissue microarray (TMA) immunohistochemistry (IHC) analysis**

65 Normal breast tissues microarrays from 683 women were generated from paraffin-embedded blocks  
66 obtained from the KTB at the Tissue procurement & Distribution core of the IU Simon Comprehensive Cancer  
67 Center. Due to loss of material during TMA construction and processing, 58% (n=395) of these tissue biopsies  
68 were interpretable. TMA was analyzed with the following antibodies FAM83A (Protein Tech 20618-1-AP,  
69 1:100), NEK2 (MyBioSource MBS9607934, 1:100), Ki67 (DAKO IR 626, ready-to-use), estrogen receptor  
70 alpha (ER $\alpha$ ) (clone:EP1, DAKO IR 084, ready-to-use), FOXA1 (Santa Cruz Biotechnology sc-6553, 1:100),  
71 and GATA3 (Santa Cruz Biotechnology sc-268, 1:50) (70). IHC was performed in a Clinical Laboratory  
72 Improvement Amendments (CLIA)-certified histopathology laboratory and evaluated by 3 pathologists in a  
73 blinded manner. Quantitative measurements generating positivity and H-score were done using the automated  
74 Aperio Imaging system using an FDA-approved algorithm (71).

#### 75 **Statistical analysis**

76 Comparisons between groups were done using either Student's *t*-test or nonparametric Mann-Whitney  
77 test on GraphPad Prism 9. Difference between groups is considered significant at  $p$ -values<0.05. Pearson's  
78 correlation analysis was performed to determine the strength and direction of the linear relationship between  
79 DNA methylation and transcription for given targets. Only correlations with a  $p$ <0.05 are shown. For  
80 transcriptome and methylome data, differential analysis was performed using DESeq2 and the previously  
81 described Z-score method (65, 66), respectively.  $P$ -values <0.05 are considered significant and are corrected



for multiple testing using the Benjamini-Hochberg False Discovery Rate (FDR) algorithm. For the tissue microarrays analysis nonparametric Wilcoxon rank-sum tests were used for unpaired analyses, as positivity and H-scores were not normally distributed, whereas nonparametric Wilcoxon signed-rank tests were used for paired analyses. The statistical software SAS version 9.4 (SAS Institute Inc., Cary, NC) was used to complete the statistical analyses with  $p < 0.05$  considered significant. Baseline demographic characteristics were summarized as median (range) for continuous variables and number and percentage for categorical variables. Comparisons between groups were done using Chi-square tests (or Fisher's Exact test, where appropriate) for categorical variables, or Wilcoxon test for continuous variables.

## LIST OF ABBREVIATIONS

**BC:** breast cancer; **KTB:** Susan G. Komen Tissue bank at IU Simon Comprehensive cancer center; **IHC:** immunohistochemistry; **IPA:** Ingenuity pathway analysis

## DECLARATIONS

**Ethics approval and consent to participate:** Breast specimens were obtained from the Susan G. Komen Tissue Bank at the IU Simon Comprehensive Cancer Center (KTB) and donated upon informed consent by healthy women volunteers. Subjects were recruited under a protocol approved by the Indiana University Institutional Review Board (IRB protocols number 1011003097 and 1607623663)

**Consent for publication:** Not applicable

**Availability of data and materials:** Methylome and Transcriptome data are available in Gene Expression Omnibus (GEO) with GSE164694 (<https://www.ncbi.nlm.nih.gov/geo/query/acc.cgi?acc=GSE164694>) which includes the Sub Series GSE164640 (MeCap dataset) and GSE164641 (RNA-seq dataset). Transcriptomic data of primary and immortalized breast epithelial cells from Dr. Nakshatri's team (20) were obtained from GEO with accession number GSE108541 (<https://www.ncbi.nlm.nih.gov/geo/query/acc.cgi?acc=GSE108541>).

**Competing interests:** The authors have no conflicts of interest to disclose.

15 **Funding:** The work including sample processing, data collection and analysis was funded by the Breast Cancer  
16 Research Foundation (BCRF-18-155 and BCRF-19-155 to A.M.S) and the Hero Foundation. The Susan G.  
17 Komen Tissue Bank at the IU Simon Comprehensive Cancer Center (IUSCCC) is supported by the IUSCCC,  
18 Susan G. Komen, and the Vera Bradley Foundation for Breast Cancer Research.

19 **Authors' contributions:** N.M. conceived the idea and designed the experiments, analyzed, and interpreted the  
20 data, and was major contributor in writing the manuscript. N.M. and RG performed the experiments and  
21 generated the data. A.V. assisted with tissue processing. R.P, D.R., J.H., J.W., G.S., and S.A. analyzed the data.  
22 C.T. performed the immunostaining of the tissue microarray. P.R. provided the specimens used in this study.  
23 K.N. and H.N. provided input on the manuscript. A.M.S. participated in hypothesis generation, funded the  
24 work, and contributed to the manuscript preparation. All the authors read and approved the manuscript.

25 **Acknowledgements:** Samples from the Susan G. Komen Tissue Bank at the IU Simon Comprehensive Cancer  
26 Center were used in this study. We thank the tissue donors, whose help and participation made this work  
27 possible. We thank the IU Simon Comprehensive Cancer Center for the use of the Tissue Procurement &  
28 Distribution Core, which provided the generation of the tissue microarray. We thank the Immunohistochemistry  
29 Core for the immunostaining and analysis of the tissue microarrays and the Center for Genomics and  
30 Bioinformatics Core at IU Bloomington for the –omics analyses.

## 32 REFERENCES

- 33 1. Michailidou K, Lindstrom S, Dennis J, Beesley J, Hui S, Kar S, et al. Association analysis identifies 65  
34 new breast cancer risk loci. *Nature*. 2017;551(7678):92-4.
- 35 2. Milne RL, Kuchenbaecker KB, Michailidou K, Beesley J, Kar S, Lindstrom S, et al. Identification of ten  
36 variants associated with risk of estrogen-receptor-negative breast cancer. *Nat Genet*. 2017;49(12):1767-78.
- 37 3. Hu C, Hart SN, Gnanaolivu R, Huang H, Lee KY, Na J, et al. A Population-Based Study of Genes  
38 Previously Implicated in Breast Cancer. *N Engl J Med*. 2021.

- 39 4. Breast Cancer Association C, Dorling L, Carvalho S, Allen J, Gonzalez-Neira A, Luccarini C, et al.  
40 Breast Cancer Risk Genes - Association Analysis in More than 113,000 Women. *N Engl J Med.*  
41 2021;384(5):428-39.
- 42 5. Feng H, Gusev A, Pasaniuc B, Wu L, Long J, Abu-Full Z, et al. Transcriptome-wide association study  
43 of breast cancer risk by estrogen-receptor status. *Genet Epidemiol.* 2020;44(5):442-68.
- 44 6. Ferreira MA, Gamazon ER, Al-Ejeh F, Aittomaki K, Andrulis IL, Anton-Culver H, et al. Genome-wide  
45 association and transcriptome studies identify target genes and risk loci for breast cancer. *Nat Commun.*  
46 2019;10(1):1741.
- 47 7. Gao G, Pierce BL, Olopade OI, Im HK, Huo D. Trans-ethnic predicted expression genome-wide  
48 association analysis identifies a gene for estrogen receptor-negative breast cancer. *PLoS Genet.*  
49 2017;13(9):e1006727.
- 50 8. Hoffman JD, Graff RE, Emami NC, Tai CG, Passarelli MN, Hu D, et al. Cis-eQTL-based trans-ethnic  
51 meta-analysis reveals novel genes associated with breast cancer risk. *PLoS Genet.* 2017;13(3):e1006690.
- 52 9. Wu L, Shi W, Long J, Guo X, Michailidou K, Beesley J, et al. A transcriptome-wide association study  
53 of 229,000 women identifies new candidate susceptibility genes for breast cancer. *Nat Genet.* 2018;50(7):968-  
54 78.
- 55 10. Kothari C, Ouellette G, Labrie Y, Jacob S, Diorio C, Durocher F. Identification of a gene signature for  
56 different stages of breast cancer development that could be used for early diagnosis and specific therapy.  
57 *Oncotarget.* 2018;9(100):37407-20.
- 58 11. Cantone I, Fisher AG. Epigenetic programming and reprogramming during development. *Nat Struct*  
59 *Mol Biol.* 2013;20(3):282-9.
- 50 12. Hansmann T, Pliushch G, Leubner M, Kroll P, Endt D, Gehrig A, et al. Constitutive promoter  
51 methylation of BRCA1 and RAD51C in patients with familial ovarian cancer and early-onset sporadic breast  
52 cancer. *Hum Mol Genet.* 2012;21(21):4669-79.
- 53 13. Jones PA, Baylin SB. The epigenomics of cancer. *Cell.* 2007;128(4):683-92.

- 54 14. Marino N, German R, Rao X, Simpson E, Liu S, Wan J, et al. Upregulation of lipid metabolism genes in  
55 the breast prior to cancer diagnosis. *NPJ Breast Cancer*. 2020;6:50.
- 56 15. Latimer JJ, Johnson JM, Kelly CM, Miles TD, Beaudry-Rodgers KA, Lalanne NA, et al. Nucleotide  
57 excision repair deficiency is intrinsic in sporadic stage I breast cancer. *Proc Natl Acad Sci U S A*.  
58 2010;107(50):21725-30.
- 59 16. Ziegler Y, Laws MJ, Sanabria Guillen V, Kim SH, Dey P, Smith BP, et al. Suppression of FOXM1  
70 activities and breast cancer growth in vitro and in vivo by a new class of compounds. *NPJ Breast Cancer*.  
71 2019;5:45.
- 72 17. Curtis C, Shah SP, Chin SF, Turashvili G, Rueda OM, Dunning MJ, et al. The genomic and  
73 transcriptomic architecture of 2,000 breast tumours reveals novel subgroups. *Nature*. 2012;486(7403):346-52.
- 74 18. Pereira B, Chin SF, Rueda OM, Vollan HK, Provenzano E, Bardwell HA, et al. The somatic mutation  
75 profiles of 2,433 breast cancers refines their genomic and transcriptomic landscapes. *Nat Commun*.  
76 2016;7:11479.
- 77 19. Piazza R, Ramazzotti D, Spinelli R, Pirola A, De Sano L, Ferrari P, et al. OncoScore: a novel, Internet-  
78 based tool to assess the oncogenic potential of genes. *Sci Rep*. 2017;7:46290.
- 79 20. Kumar B, Prasad M, Bhat-Nakshatri P, Anjanappa M, Kalra M, Marino N, et al. Normal Breast-Derived  
80 Epithelial Cells with Luminal and Intrinsic Subtype-Enriched Gene Expression Document Interindividual  
81 Differences in Their Differentiation Cascade. *Cancer Res*. 2018;78(17):5107-23.
- 82 21. Neri F, Rapelli S, Krepelova A, Incarnato D, Parlato C, Basile G, et al. Intragenic DNA methylation  
83 prevents spurious transcription initiation. *Nature*. 2017;543(7643):72-7.
- 84 22. Kulis M, Heath S, Bibikova M, Queiros AC, Navarro A, Clot G, et al. Epigenomic analysis detects  
85 widespread gene-body DNA hypomethylation in chronic lymphocytic leukemia. *Nat Genet*. 2012;44(11):1236-  
86 42.
- 87 23. Kufe DW. MUC1-C oncoprotein as a target in breast cancer: activation of signaling pathways and  
88 therapeutic approaches. *Oncogene*. 2013;32(9):1073-81.

- 39 24. Jing X, Liang H, Hao C, Yang X, Cui X. Overexpression of MUC1 predicts poor prognosis in patients  
30 with breast cancer. *Oncol Rep.* 2019;41(2):801-10.
- 31 25. Saghafeinia S, Mina M, Riggi N, Hanahan D, Ciriello G. Pan-Cancer Landscape of Aberrant DNA  
32 Methylation across Human Tumors. *Cell Rep.* 2018;25(4):1066-80 e8.
- 33 26. Chen X, Zhang J, Dai X. DNA methylation profiles capturing breast cancer heterogeneity. *BMC*  
34 *Genomics.* 2019;20(1):823.
- 35 27. de Almeida BP, Apolonio JD, Binnie A, Castelo-Branco P. Roadmap of DNA methylation in breast  
36 cancer identifies novel prognostic biomarkers. *BMC Cancer.* 2019;19(1):219.
- 37 28. Xu Z, Sandler DP, Taylor JA. Blood DNA Methylation and Breast Cancer: A Prospective Case-Cohort  
38 Analysis in the Sister Study. *J Natl Cancer Inst.* 2020;112(1):87-94.
- 39 29. Johnson KC, Houseman EA, King JE, Christensen BC. Normal breast tissue DNA methylation  
40 differences at regulatory elements are associated with the cancer risk factor age. *Breast Cancer Res.*  
41 2017;19(1):81.
- 42 30. Sehl ME, Henry JE, Storniolo AM, Ganz PA, Horvath S. DNA methylation age is elevated in breast  
43 tissue of healthy women. *Breast Cancer Res Treat.* 2017;164(1):209-19.
- 44 31. Horvath S. DNA methylation age of human tissues and cell types. *Genome Biol.* 2013;14(10):R115.
- 45 32. Tyrer J, Duffy SW, Cuzick J. A breast cancer prediction model incorporating familial and personal risk  
46 factors. *Stat Med.* 2004;23(7):1111-30.
- 47 33. Branigan TB, Kozono D, Schade AE, Deraska P, Rivas HG, Sambel L, et al. MMB-FOXM1-driven  
48 premature mitosis is required for CHK1 inhibitor sensitivity. *Cell Rep.* 2021;34(9):108808.
- 49 34. Fulcher LJ, Bozatzki P, Tachie-Menson T, Wu KZL, Cummins TD, Bufton JC, et al. The DUF1669  
50 domain of FAM83 family proteins anchor casein kinase 1 isoforms. *Sci Signal.* 2018;11(531).
- 51 35. Cipriano R, Graham J, Miskimen KL, Bryson BL, Bruntz RC, Scott SA, et al. FAM83B mediates  
52 EGFR- and RAS-driven oncogenic transformation. *J Clin Invest.* 2012;122(9):3197-210.

- 13 36. Cipriano R, Miskimen KL, Bryson BL, Foy CR, Bartel CA, Jackson MW. Conserved oncogenic  
14 behavior of the FAM83 family regulates MAPK signaling in human cancer. *Mol Cancer Res.* 2014;12(8):1156-  
15 65.
- 16 37. Parameswaran N, Bartel CA, Hernandez-Sanchez W, Miskimen KL, Smigiel JM, Khalil AM, et al. A  
17 FAM83A Positive Feed-back Loop Drives Survival and Tumorigenicity of Pancreatic Ductal Adenocarcinomas.  
18 *Sci Rep.* 2019;9(1):13396.
- 19 38. Bartel CA, Jackson MW. HER2-positive breast cancer cells expressing elevated FAM83A are sensitive  
20 to FAM83A loss. *PLoS One.* 2017;12(5):e0176778.
- 21 39. Richtmann S, Wilkens D, Warth A, Lasitschka F, Winter H, Christopoulos P, et al. FAM83A and  
22 FAM83B as Prognostic Biomarkers and Potential New Therapeutic Targets in NSCLC. *Cancers (Basel).*  
23 2019;11(5).
- 24 40. Zheng YW, Li ZH, Lei L, Liu CC, Wang Z, Fei LR, et al. FAM83A Promotes Lung Cancer Progression  
25 by Regulating the Wnt and Hippo Signaling Pathways and Indicates Poor Prognosis. *Front Oncol.* 2020;10:180.
- 26 41. Snijders AM, Lee SY, Hang B, Hao W, Bissell MJ, Mao JH. FAM83 family oncogenes are broadly  
27 involved in human cancers: an integrative multi-omics approach. *Mol Oncol.* 2017;11(2):167-79.
- 28 42. Zhang J, Sun G, Mei X. Elevated FAM83A expression predicts poorer clinical outcome in lung  
29 adenocarcinoma. *Cancer Biomark.* 2019;26(3):367-73.
- 30 43. Rong L, Li H, Li Z, Ouyang J, Ma Y, Song F, et al. FAM83A as a Potential Biological Marker Is  
31 Regulated by miR-206 to Promote Cervical Cancer Progression Through PI3K/AKT/mTOR Pathway. *Front*  
32 *Med (Lausanne).* 2020;7:608441.
- 33 44. Pawitan Y, Bjohle J, Amler L, Borg AL, Egyhazi S, Hall P, et al. Gene expression profiling spares early  
34 breast cancer patients from adjuvant therapy: derived and validated in two population-based cohorts. *Breast*  
35 *Cancer Res.* 2005;7(6):R953-64.
- 36 45. Lee SY, Meier R, Furuta S, Lenburg ME, Kenny PA, Xu R, et al. FAM83A confers EGFR-TKI  
37 resistance in breast cancer cells and in mice. *J Clin Invest.* 2012;122(9):3211-20.

- 38 46. Grant S. FAM83A and FAM83B: candidate oncogenes and TKI resistance mediators. *J Clin Invest.*  
39 2012;122(9):3048-51.
- 40 47. Hayward DG, Fry AM. Nek2 kinase in chromosome instability and cancer. *Cancer Lett.*  
41 2006;237(2):155-66.
- 42 48. Chen S, Huang J, Liu Z, Liang Q, Zhang N, Jin Y. FAM83A is amplified and promotes cancer stem  
43 cell-like traits and chemoresistance in pancreatic cancer. *Oncogenesis.* 2017;6(3):e300.
- 44 49. Fry AM, O'Regan L, Sabir SR, Bayliss R. Cell cycle regulation by the NEK family of protein kinases. *J*  
45 *Cell Sci.* 2012;125(Pt 19):4423-33.
- 46 50. Hayward DG, Clarke RB, Faragher AJ, Pillai MR, Hagan IM, Fry AM. The centrosomal kinase Nek2  
47 displays elevated levels of protein expression in human breast cancer. *Cancer Res.* 2004;64(20):7370-6.
- 48 51. Kokuryo T, Yokoyama Y, Yamaguchi J, Tsunoda N, Ebata T, Nagino M. NEK2 Is an Effective Target  
49 for Cancer Therapy With Potential to Induce Regression of Multiple Human Malignancies. *Anticancer Res.*  
50 2019;39(5):2251-8.
- 51 52. Fang Y, Zhang X. Targeting NEK2 as a promising therapeutic approach for cancer treatment. *Cell*  
52 *Cycle.* 2016;15(7):895-907.
- 53 53. Gormally MV, Dexheimer TS, Marsico G, Sanders DA, Lowe C, Matak-Vinkovic D, et al. Suppression  
54 of the FOXM1 transcriptional programme via novel small molecule inhibition. *Nat Commun.* 2014;5:5165.
- 55 54. Cho YH, Yazici H, Wu HC, Terry MB, Gonzalez K, Qu M, et al. Aberrant promoter hypermethylation  
56 and genomic hypomethylation in tumor, adjacent normal tissues and blood from breast cancer patients.  
57 *Anticancer Res.* 2010;30(7):2489-96.
- 58 55. Esteller M, Silva JM, Dominguez G, Bonilla F, Matias-Guiu X, Lerma E, et al. Promoter  
59 hypermethylation and BRCA1 inactivation in sporadic breast and ovarian tumors. *J Natl Cancer Inst.*  
50 2000;92(7):564-9.

- 51 56. Flanagan JM, Munoz-Alegre M, Henderson S, Tang T, Sun P, Johnson N, et al. Gene-body  
52 hypermethylation of ATM in peripheral blood DNA of bilateral breast cancer patients. *Hum Mol Genet.*  
53 2009;18(7):1332-42.
- 54 57. Potapova A, Hoffman AM, Godwin AK, Al-Saleem T, Cairns P. Promoter hypermethylation of the  
55 PALB2 susceptibility gene in inherited and sporadic breast and ovarian cancer. *Cancer Res.* 2008;68(4):998-  
56 1002.
- 57 58. Eswaran J, Patnaik D, Filippakopoulos P, Wang F, Stein RL, Murray JW, et al. Structure and functional  
58 characterization of the atypical human kinase haspin. *Proc Natl Acad Sci U S A.* 2009;106(48):20198-203.
- 59 59. Siegel RL, Miller KD, Jemal A. Cancer statistics, 2020. *CA Cancer J Clin.* 2020;70(1):7-30.
- 60 60. Teschendorff AE, Zhu T, Breeze CE, Beck S. EPISCORE: cell type deconvolution of bulk tissue DNA  
61 methylomes from single-cell RNA-Seq data. *Genome Biol.* 2020;21(1):221.
- 62 61. Newman AM, Steen CB, Liu CL, Gentles AJ, Chaudhuri AA, Scherer F, et al. Determining cell type  
63 abundance and expression from bulk tissues with digital cytometry. *Nat Biotechnol.* 2019;37(7):773-82.
- 64 62. McClintock AH, Golob AL, Laya MB. Breast Cancer Risk Assessment: A Step-Wise Approach for  
65 Primary Care Providers on the Front Lines of Shared Decision Making. *Mayo Clin Proc.* 2020;95(6):1268-75.
- 66 63. Dobin A, Davis CA, Schlesinger F, Drenkow J, Zaleski C, Jha S, et al. STAR: ultrafast universal RNA-  
67 seq aligner. *Bioinformatics.* 2013;29(1):15-21.
- 68 64. Li H, Durbin R. Fast and accurate short read alignment with Burrows-Wheeler transform.  
69 *Bioinformatics.* 2009;25(14):1754-60.
- 70 65. Maiuri AR, Peng M, Podicheti R, Sriramkumar S, Kamplain CM, Rusch DB, et al. Mismatch Repair  
71 Proteins Initiate Epigenetic Alterations during Inflammation-Driven Tumorigenesis. *Cancer Res.*  
72 2017;77(13):3467-78.
- 73 66. Maiuri AR, Savant SS, Podicheti R, Rusch DB, O'Hagan HM. DNA methyltransferase inhibition  
74 reduces inflammation-induced colon tumorigenesis. *Epigenetics.* 2019;14(12):1209-23.



- 35 67. Cheadle C, Vawter MP, Freed WJ, Becker KG. Analysis of microarray data using Z score  
36 transformation. *J Mol Diagn*. 2003;5(2):73-81.
- 37 68. Kramer A, Green J, Pollard J, Jr., Tugendreich S. Causal analysis approaches in Ingenuity Pathway  
38 Analysis. *Bioinformatics*. 2014;30(4):523-30.
- 39 69. Chandrashekar DS, Bashel B, Balasubramanya SAH, Creighton CJ, Ponce-Rodriguez I, Chakravarthi B,  
40 et al. UALCAN: A Portal for Facilitating Tumor Subgroup Gene Expression and Survival Analyses. *Neoplasia*.  
41 2017;19(8):649-58.
- 42 70. Nakshatri H, Kumar B, Burney HN, Cox ML, Jacobsen M, Sandusky GE, et al. Genetic Ancestry-  
43 dependent Differences in Breast Cancer-induced Field Defects in the Tumor-adjacent Normal Breast. *Clin*  
44 *Cancer Res*. 2019;25(9):2848-59.
- 45 71. Sandusky GE, Mintze KS, Pratt SE, Dantzig AH. Expression of multidrug resistance-associated protein  
46 2 (MRP2) in normal human tissues and carcinomas using tissue microarrays. *Histopathology*. 2002;41(1):65-74.

## 49 ADDITIONAL FILES

50 Additional File 1: Supplementary Tables. File format:.xls. It includes subjects demographics and raw data in  
51 form of tables.

52 Additional File 2: Supplementary Figures. File format:.pdf. It includes additional data related to the main  
53 findings shown in the main figures.

## 55 FIGURE LEGENDS

56 **Figure 1: Transcriptome profiling of breast tissues from women at either high- or average risk of breast**  
57 **cancer. A)** Schematics of the study design. Cancer-free breast tissue cores (N=146) were divided in either

high-risk or average-risk group according to the Tyrer-Cuzick breast cancer risk evaluation score (20% used as threshold). The tissues were processed and analyzed for whole transcriptome and methylome profiling and differentially expressed genes (DEG) and differentially methylated sites between high- and average-risk samples were identified. Thirty five women (10 high risk and 25 average risk) donated also a second biopsy (D2) allowing to detect age-dependent aberrations. **B)** Pathway analysis of the transcripts differentially expressed (FDR<0.05) between average and high- risk breasts. **C)** Major molecular network of the differentially expressed transcripts between the two experimental groups. Genes upregulated in high-risk breasts are in red, while downregulated genes are in green. **D)** FAM83A and NEK2 transcription level in breast tissues from women at either average- or high-risk of developing breast cancer. **E)** Upper panel: Representative image of the immunofluorescence staining of primary breast epithelial cells with the epithelial marker, E-Cadherin (red), mesenchymal marker, Vimentin (green) as control, and nuclear staining, DAPI (blue). E-Cadherin and Vimentin staining of primary cells revealed that isolated primary cells are epithelial in nature. Lower panel: FAM83A and NEK2 expression in primary epithelial cells isolated from either average-risk (n=4) and high-risk breast (n=3). **F)** FAM83A and NEK2 expression in primary and h-TERT immortalized isogenic breast epithelial cells (n=7) from the GSE108541 dataset. **G)** Representative images of immunohistochemical staining for FAM83A and NEK2 are shown at 20X magnification. Staining quantification is expressed as positivity and H-score. Data are shown as mean  $\pm$  standard error. #: FDR<0.005, \*:  $p$ <0.05, \*\* $p$ <0.001, \*\*\* $p$ <0.0001.  $P$ value is calculated using either unpaired nonparametric Mann-Whitney test or nonparametric Wilcoxon test.

**Figure 2: Methylome profiling of breast tissues from women at either high- or average risk of breast cancer.** **A)** Chromosomal distribution of the DNA methylation aberrations observed in high-risk versus average-risk group. **B)** Heatmap of the 20 highest differentially methylated regions in high-risk breasts as compared with average-risk breasts at FDR<0.05. The overlapping gene name is indicated on the left. **C)** Genomic localization (intron, coding, promoter or UTR) of the DNA methylation aberrations including regions either hypo- or hyper-methylated in high-risk versus average-risk breasts. Data are shown as percentage of each genomic localizaton versus the total number of sites. **D)** Pathway analysis of the genes affected by DNA

33 methylation aberrations (FDR<0.05) in high-risk breasts as compared with breast from women at average risk

34 for breast cancer. **E)** One of the molecular networks including the genes affected by DNA hypermethylation.

35 **Figure 3: Correlation between degree of DNA methylation and gene expression.** **A)** Pearson's correlation

36 analysis between DNA methylation value and expression of the genes found differentially expressed between

37 high- and average-risk breasts. **B)** Pearson's correlation analysis of the DNA methylation and expression of

38 PHACTR1, hypermethylated in the breasts of high-risk women.  $r$  is the correlation coefficient and  $p$  is  $p$ value.

39 **Figure 4: Age-related transcriptome and DNA methylation changes in healthy breast tissues.** **A)**

40 Differentially expressed genes between the first (D1) and second (D2) donation time point in the breast tissues

41 from average (blue bars) and high- (orange bars) risk women. Ratio between D2 and D1 is shown. **B)** Pearson's

42 correlation test between DNA methylation and transcription of GRIA4 and DNMT3 in average- and high-risk

43 breasts at the two time points, D1 and D2, **C)** Number of genomic locations (intron, coding regions, promoter,

44 UTR) of the age-related DNA methylation events. N.A.: not available. **D)** Venn diagram of the DNA

45 methylation changes associated with age comparing our data set (D2/D1) with Horvath' epigenetic clock (353

46 CpGs) or Johnson's age-associated loci (787 CpGs) **E)** Differentially methylated regions between the first (D1)

47 and second (D2) donation time point in the breast tissues from average (blue bars) and high- (orange bars) risk

48 women. Ratio between D2 and D1 is shown. \* $p$ <0.05; \*\* $p$ <0.001

49

**Table 1: Gene expression differences in high- versus average-risk breasts (FC>2; FDR<0.05)**

| Gene name | Description                                           | log2fc <sup>a</sup> | FDR   | % genetic alterations <sup>b</sup> | Tumor/ Normal expression (pvalue) <sup>c</sup> | Copy Number Variation (CNV) <sup>d</sup> |                     | Onco score |
|-----------|-------------------------------------------------------|---------------------|-------|------------------------------------|------------------------------------------------|------------------------------------------|---------------------|------------|
|           |                                                       |                     |       |                                    |                                                | CNV=2 (%), p value                       | CNV=-2 (%), p value |            |
| MEPE      | Matrix extracellular phosphoglycoprotein              | 2.28                | 2E-02 | 0.7                                | 0.02 (n.s.)                                    | 12 (0.6), n.s.                           | 2 (0.1), <0.001     | 15.6       |
| OPRPN     | Opiorphin prepropeptide                               | 2.10                | 3E-03 | 1.3                                | N.A.                                           | 31 (1.4), n.s.                           | 0 (0)               | N.A.       |
| CXCL13    | C-X-C motif chemokine ligand 13                       | 2.07                | 4E-03 | 1.3                                | 6.6 (0,003)                                    | 26 (1.2), n.s.                           | 0 (0)               | 33.7       |
| APELA     | Apelin receptor early endogenous ligand               | 1.87                | 8E-04 | 0.3                                | N.A.                                           | N.A.                                     | 0 (0)               | N.A.       |
| CA6       | Carbonic anhydrase 6                                  | 1.78                | 6E-04 | 0.8                                | 0 (n.s.)                                       | 2 (0.1), n.s.                            | 3 (0.1), <0.001     | 14.4       |
| DIO2      | Iodothyronine deiodinase 2                            | 1.60                | 2E-03 | 0.6                                | 1.94 (n.s.)                                    | 13 (0.6), n.s.                           | 0 (0)               | 7.7        |
| FEZF2     | FEZ family zinc finger 2                              | 1.55                | 7E-03 | 0.7                                | 0.04 (<0.001)                                  | 3 (0.1), n.s.                            | 0 (0)               | 16.1       |
| TNNT1     | Troponin T1%2C slow skeletal type                     | 1.52                | 9E-03 | 2.3                                | 51.87 (n.s.)                                   | 36 (1.7), n.s.                           | 0 (0)               | 12.3       |
| MMP3      | Matrix metalloproteinase 3                            | 1.43                | 2E-02 | 1.8                                | 5.66 (<0.001)                                  | 26 (1.2), n.s.                           | 1 (0.04), <0.001    | 31.9       |
| SERPINA12 | Serpin family A member 12                             | 1.42                | 2E-02 | 0.9                                | 1.26 (<0.001)                                  | 12 (0.6), n.s.                           | 1 (0), <0.001       | 11.9       |
| C8B       | Complement C8 beta chain                              | 1.42                | 3E-02 | 1.8                                | 0.014 (n.s.)                                   | 37 (1.7), n.s.                           | 1 (0), <0.001       | 7.3        |
| KCNJ13    | Potassium voltage-gated channel subfamily J member 13 | 1.41                | 3E-03 | 0.6                                | 0.16 (0.03)                                    | 2 (0.1), n.s.                            | 1 (0), <0.001       | 9.0        |
| CXCL6     | C-X-C motif chemokine ligand 6                        | 1.37                | 5E-03 | 2.2                                | 0.10 (0.04)                                    | 43 (2), n.s.                             | 0 (0), n.s.         | 31.0       |
| SLC12A1   | Solute carrier family 12 member 1                     | 1.33                | 1E-02 | 0.9                                | 0.48 (<0.001)                                  | 4 (0.2), n.s.                            | 1 (0), <0.001       | 5.6        |
| CYP24A1   | Cytochrome P450 family 24 subfamily A member 1        | 1.33                | 3E-02 | 7.0                                | 0.22 (n.s.)                                    | 164 (7.5), <0.001                        | 1 (0), n.s.         | 30.2       |
| ASB5      | Ankyrin repeat and SOCS box containing 5              | 1.29                | 4E-03 | 1.3                                | 0.01 (n.s.)                                    | 6 (0.3), n.s.                            | 5 (0.2), <0.001     | 0.0        |
| NPY2R     | Neuropeptide Y receptor Y2                            | 1.27                | 3E-02 | 1.0                                | 0.003 (<0.001)                                 | 10 (0.5), n.s.                           | 0 (0)               | 7.9        |
| C2CD4A    | C2 calcium dependent domain containing 4A             | 1.26                | 2E-02 | 0.6                                | 0.9 (<0.001)                                   | 12 (0.6), n.s.                           | 1 (0), <0.001       | 11.2       |
| GABRR1    | gamma-aminobutyric acid type A receptor rho1 subunit  | 1.26                | 3E-02 | 1.1                                | 1.03 (0.03)                                    | 13 (0.6), n.s.                           | 5 (0.2), <0.001     | 8.7        |
| KIAA1210  | KIAA1210                                              | 1.25                | 7E-03 | 1.6                                | 0.43 (n.s.)                                    | 18 (0.8), n.s.                           | 3 (0.1), <0.001     | 0.0        |

|          |                                                                  |      |       |      |                |                   |                 |      |
|----------|------------------------------------------------------------------|------|-------|------|----------------|-------------------|-----------------|------|
| MMP10    | Matrix metalloproteinase 10                                      | 1.23 | 2E-02 | 1.6  | 7.07 (<0.001)  | 26 (1.2), n.s.    | 1 (0), <0.001   | 38.2 |
| FAM83A   | Family with sequence similarity 83 member A                      | 1.22 | 5E-03 | 16.0 | 1.23 (<0.001)  | 503(23.1),<0.001  | 0 (0)           | 74.5 |
| LPO      | Lactoperoxidase                                                  | 1.21 | 1E-02 | 7.0  | 0.5 (<0.001)   | 168 (7.7),2E-24   | 1 (0), n.s.     | 11.5 |
| CRISP2   | Cysteine rich secretory protein 2                                | 1.19 | 3E-02 | 1.5  | 0.06 (0.01)    | 31 (1.4), 3E-05   | 0 (0)           | 8.2  |
| NMU      | Neuromedin U                                                     | 1.19 | 2E-02 | 0.8  | 3.6 (<0.001)   | 18 (0.8), n.s.    | 1 (0), <0.001   | 41.6 |
| MAGEB4   | MAGE family member B4                                            | 1.18 | 9E-03 | 0.8  | 8.6 (0.004)    | 10 (0.5), n.s.    | 2 (0.1),<0.001  | 55.9 |
| MAG      | Myelin associated glycoprotein                                   | 1.17 | 4E-02 | 2.3  | 5.3 (<0.001)   | 42 (1.9), 0.001   | 0 (0)           | 13.2 |
| DAPL1    | Death associated protein like 1                                  | 1.17 | 5E-03 | 0.7  | 0.09 (n.s.)    | 10 (0.5), n.s.    | 0 (0)           | 14.0 |
| PRSS51   | Serine protease 51                                               | 1.16 | 2E-02 | 1.6  | N.A.           | 0 (0)             | 0 (0)           | N.A. |
| PBK      | PDZ binding kinase                                               | 1.14 | 4E-03 | 3.0  | 15.7 (<0.001)  | 20 (0.9), n.s.    | 15(0.7),<0.001  | 28.3 |
| KRT77    | Keratin 77                                                       | 1.13 | 4E-02 | 0.8  | 0.04 (n.s.)    | 12 (0.6), n.s.    | 0 (0)           | 0.0  |
| CALML3   | Calmodulin like 3                                                | 1.12 | 3E-02 | 4.0  | 0.15 (n.s.)    | 108 (5),<0.001    | 0 (0)           | 37.7 |
| ACBD7    | Acyl-CoA binding domain containing 7                             | 1.12 | 3E-03 | 2.3  | 1.13 (0.002)   | 78 (3.6),<0.001   | 0 (0)           | 0.0  |
| UNC5D    | Unc-5 netrin receptor D                                          | 1.11 | 2E-02 | 8.0  | 0.001 (n.s.)   | 152 (7), n.s.     | 6 (0.3),<0.001  | 44.8 |
| ESCO2    | Establishment of sister chromatid cohesion N-acetyltransferase 2 | 1.11 | 2E-03 | 3.0  | 8.02 (<0.001)  | 20 (0.9), n.s.    | 14(0.6),<0.001  | 25.1 |
| BARX1    | BARX homeobox 1                                                  | 1.09 | 4E-02 | 5.0  | 1.54 (9E-08)   | 9 (0.4), n.s.     | 1 (0), <0.001   | 22.3 |
| CTXND1   | Cortexin domain containing 1                                     | 1.09 | 3E-02 | 0.0  | N.A.           | 0 (0)             | 0 (0)           | N.A. |
| SYT13    | Synaptotagmin 13                                                 | 1.08 | 4E-03 | 1.3  | 4.6 (<0.001)   | 36 (1.7), <0.001  | 1 (0), n.s.     | 38.8 |
| PRAME    | Preferentially expressed antigen in melanoma                     | 1.06 | 2E-02 | 1.2  | 1.8 (<0.001)   | 21 (1), n.s.      | 1 (0), <0.001   | 82.6 |
| SLC39A12 | Solute carrier family 39 member 12                               | 1.05 | 4E-03 | 2.4  | 0.18 (n.s.)    | 72 (3.3), <0.001  | 1 (0), n.s.     | 12.0 |
| IGHV2-26 | Immunoglobulin heavy variable2-26                                | 1.04 | 4E-02 | 0.1  | N.A.           | 0 (0)             | 0 (0)           | N.A. |
| APLN     | Apelin                                                           | 1.04 | 7E-04 | 0.6  | 0.93 (n.s.)    | 16 (0.7), n.s.    | 2 (0.1),<0.001  | 13.8 |
| IGHV3-30 | Immunoglobulin heavy variable3-30                                | 1.04 | 2E-02 | 0.1  | N.A.           | 0 (0)             | 0 (0)           | 48.0 |
| LPAR3    | Lysophosphatidic acid receptor 3                                 | 1.04 | 8E-03 | 0.9  | 0.28 (n.s.)    | 13 (0.6), n.s.    | 0 (0)           | 12.9 |
| ECEL1    | Endothelin converting enzyme like1                               | 1.03 | 2E-02 | 0.8  | 0.9 (n.s.)     | 1 (0), n.s.       | 1 (0), <0.001   | N.A. |
| DCX      | Doublecortin                                                     | 1.03 | 6E-03 | 0.5  | 0.1 (0.02)     | 13 (0.6), n.s.    | 2 (0.1), <0.001 | 8.7  |
| NEK2     | NIMA related kinase 2                                            | 1.02 | 7E-03 | 12.0 | 25.78 (<0.001) | 473 (21.8),<0.001 | 0 (0)           | 61.4 |

|          |                                            |       |       |     |               |                  |                 |       |
|----------|--------------------------------------------|-------|-------|-----|---------------|------------------|-----------------|-------|
| CWH43    | Cell wall biogenesis 43 C-terminal homolog | 1.02  | 3E-02 | 1.0 | 0.5 (<0.001)  | 6 (0.3), n.s.    | 0 (0)           | 12.9  |
| PRSS21   | Serine protease 21                         | 1.01  | 3E-02 | 5.0 | 0.2 (n.s.)    | 154 (7.1),5E-102 | 0 (0)           | 46.3  |
| FOXI3    | Forkhead box I3                            | 1.01  | 2E-02 | 0.3 | 0.01 (<0.001) | 10 (0.5), n.s.   | 0 (0)           | 8.5   |
| FCER2    | Fc fragment of IgE receptor II             | -0.98 | 1E-03 | 1.3 | 0.07 (0.04)   | 11 (0.5), n.s.   | 2 (0.1),<0.001  | 17.1  |
| DACH2    | Dachshund family transcription factor 2    | -1.01 | 1E-02 | 0.8 | 0.3 (n.s.)    | 17 (0.8), n.s.   | 9 (0.4),<0.001  | 25.3  |
| LILRB5   | Leukocyte immunoglobulin like receptor B5  | -1.02 | 8E-04 | 2.1 | 0.15 (<0.001) | 39 (1.8), n.s.   | 0 (0)           | 0.0   |
| SBK3     | SH3 domain binding kinase family member 3  | -1.03 | 7E-03 | 2.3 | N.A.          | 48 (2.2), n.s.   | 0 (0)           | 0.0   |
| TRDN     | Triadin                                    | -1.03 | 3E-02 | 2.3 | 0.02 (n.s.)   | 41 (1.9), n.s.   | 1 (0),< 0.001   | 1.0   |
| NXF3     | nuclear RNA export factor 3                | -1.04 | 3E-03 | 0.6 | 0.9 (n.s.)    | 8 (0.4), n.s.    | 4 (0.2),< 0.001 | 32.2  |
| LILRA6   | leukocyte immunoglobulin like receptor A6  | -1.05 | 2E-03 | 2.1 | 1 (n.s.)      | 39 (1.8), n.s.   | 1 (0), n.s.     | 0     |
| SYNDIG1L | synapse differentiation inducing 1 like    | -1.07 | 9E-03 | 0.5 | N.A.          | 8 (0.4), n.s.    | 1 (0),< 0.001   | 0     |
| ARPP21   | cAMP regulated phosphoprotein 21           | -1.13 | 2E-02 | 1.1 | 0.42 (n.s.)   | 11 (0.5), n.s.   | 1 (0),< 0.001   | 24.04 |
| SLC22A12 | solute carrier family 22 member 12         | -1.13 | 2E-02 | 1.1 | 0.9 (<0.001)  | 20 (0.9), n.s.   | 0 (0)           | 8.9   |
| CCL24    | C-C motif chemokine ligand 24              | -1.17 | 1E-02 | 0.7 | 0.98 (<0.001) | 21 (1), n.s.     | 0 (0)           | 16.2  |
| TPSD1    | tryptase delta 1                           | -1.17 | 2E-02 | 5.0 | 0.55 (0.04)   | 170 (7.8),<0.001 | 0 (0)           | 0     |
| PROK2    | prokineticin 2                             | -1.19 | 2E-02 | 0.7 | 0.24 (0.01)   | 5 (0.2), n.s.    | 1 (0), 0.001    | 18.8  |
| HBG2     | hemoglobin subunit gamma 2                 | -1.59 | 4E-02 | 1.0 | 0.2 (n.s.)    | 19 (0.9), n.s.   | 0 (0)           | 11.3  |
| FGF8     | fibroblast growth factor 8                 | -1.68 | 3E-04 | 0.3 | 0.88 (0.005)  | 2 (0.1), n.s.    | 1 (0),< 0.001   | 14.3  |
| SULT1C2  | sulfotransferase family1C member2          | -1.74 | 2E-03 | 0.5 | 1.6 (0.02)    | 9 (0.4), n.s.    | 0 (0)           | 21.8  |
| MS4A6E   | membrane spanning 4-domains A6E            | -2.24 | 4E-02 | 0.9 | N.A.          | 23 (1.1),n.s.    | 0 (0)           | 0     |

N.A. : not available; a: log fold change; b: breast cancer data from cBioportal; c: from UALCAN portal; d: data retrieved from the METABRIC, number of samples with either CNV= 2 or -2 (%), p value.

**Table 2: The 20 most differentially methylated regions between the high- and average-risk breast tissues**

| Genomic Locus     | Overlapping Gene Feature | Gene Name  | Description                                                  | $\Delta Z^{\#}$ | FDR   |
|-------------------|--------------------------|------------|--------------------------------------------------------------|-----------------|-------|
| Chr8:120,669,501  | Intron                   | SNTB1      | syntrophin beta 1                                            | 2.4             | 7E-53 |
| Chr18:6,803,751   | Intron                   | ARHGAP28   | Rho GTPase activating protein 28                             | 2.0             | 3E-35 |
| Chr6:12,944,751   | Intron                   | PHACTR1    | phosphatase and actin regulator 1                            | 1.9             | 1E-31 |
| Chr21:30,743,501  | promoter                 | KRTAP21-4P | keratin associated protein 21-4 2C pseudogene                | 1.9             | 6E-31 |
| Chr2:115,663,751  | Intron                   | DPP10      | dipeptidyl peptidase like 10                                 | 1.8             | 2E-30 |
| Chr4:87,111,001   | Intron                   | AFF1       | AF4/FMR2 family member 1                                     | 1.8             | 2E-29 |
| Chr3:33,638,251   | Intron                   | CLASP2     | cytoplasmic linker associated protein 2                      | 1.8             | 2E-29 |
| Chr14:106,498,501 | Intron                   | LINC01881  | long intergenic non-protein coding RNA1881                   | 1.8             | 2E-29 |
| Chr6:129,416,001  | Intron                   | LAMA2      | laminin subunit alpha 2                                      | 1.8             | 4E-29 |
| Chr14:31,750,251  | Intron                   | NUBPL      | nucleotide binding protein like                              | 1.8             | 2E-28 |
| Chr8:37,842,001   | Coding                   | ADGRA2     | adhesion G protein-coupled receptor A2                       | -1.2            | 1E-12 |
| Chr1:44,724,501   | Coding                   | C1orf228   | chromosome 1 open reading frame 228                          | -1.2            | 9E-13 |
| ChrX:46,575,001   | Coding                   | CHST7      | carbohydrate sulfotransferase 7                              | -1.2            | 5E-13 |
| Chr14:104,729,501 | Coding                   | ADSSL1     | adenylosuccinate synthase like 1                             | -1.3            | 1E-15 |
| Chr2:202,774,251  | Intron/promoter          | ICA1L      | islet cell autoantigen 1 like                                | -1.3            | 1E-15 |
| Chr1:155,190,001  | Coding                   | MUC1       | mucin 1, 2C cell surface associated                          | -1.4            | 2E-17 |
| Chr20:3,751,751   | Coding                   | HSPA12B    | heat shock protein family A (Hsp70) member 12B               | -1.4            | 8E-18 |
| Chr11:58,141,001  | Intron                   | OR9Q1      | olfactory receptor family 9 subfamily Q member 1             | -1.6            | 4E-22 |
| Chr1:45,803,751   | Coding                   | MAST2      | microtubule associated serine/threonine kinase 2             | -1.6            | 3E-23 |
| Chr7:636,001      | Intron                   | PRKAR1B    | protein kinase cAMP-dependent type I regulatory subunit beta | -1.7            | 1E-24 |

$\#$ : High- versus average-risk value

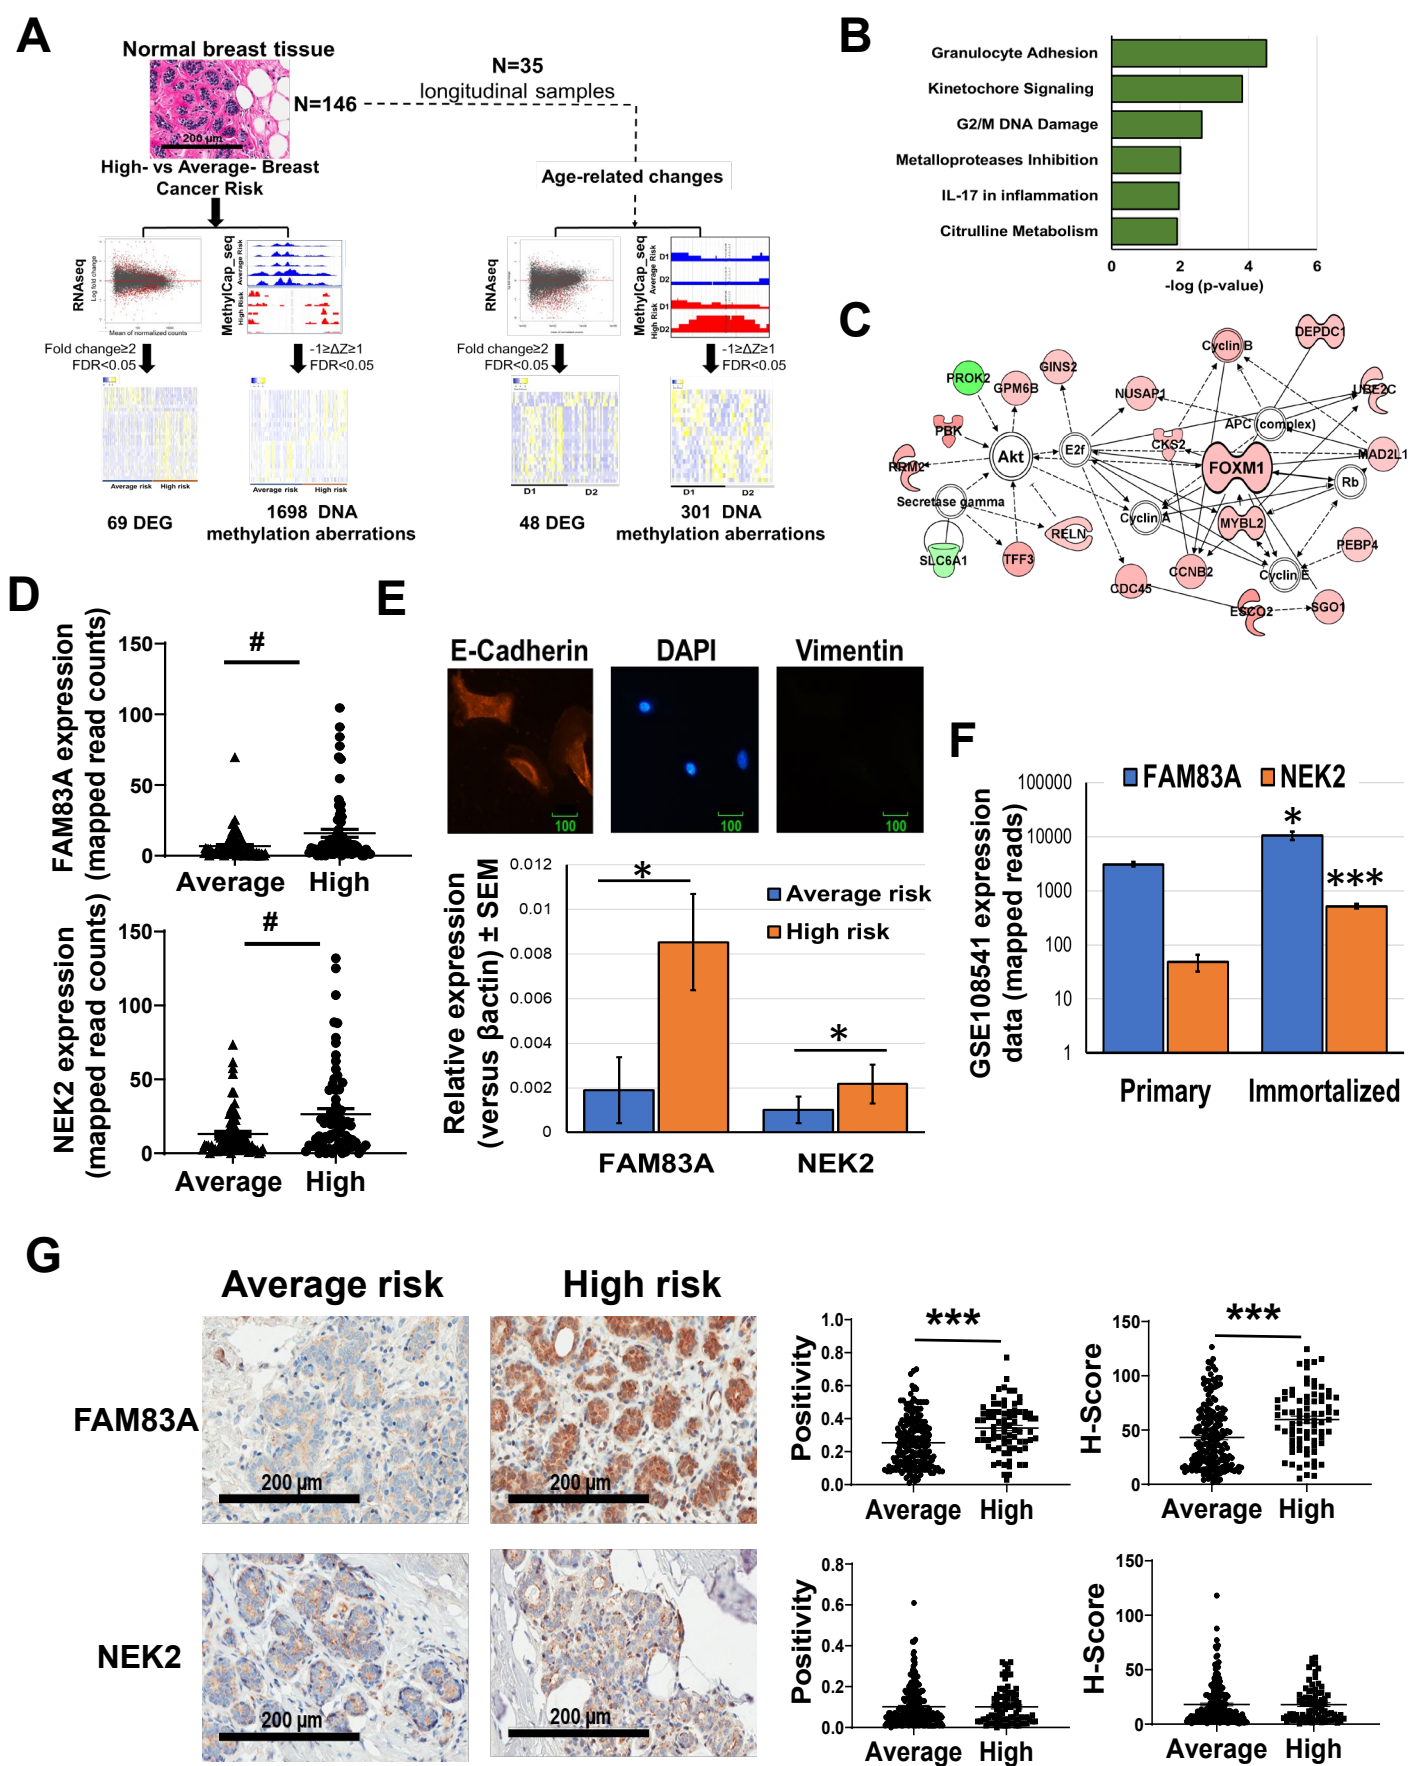

Figure 1



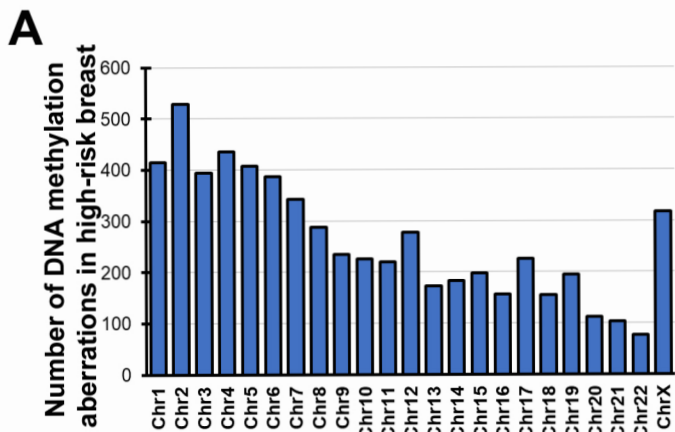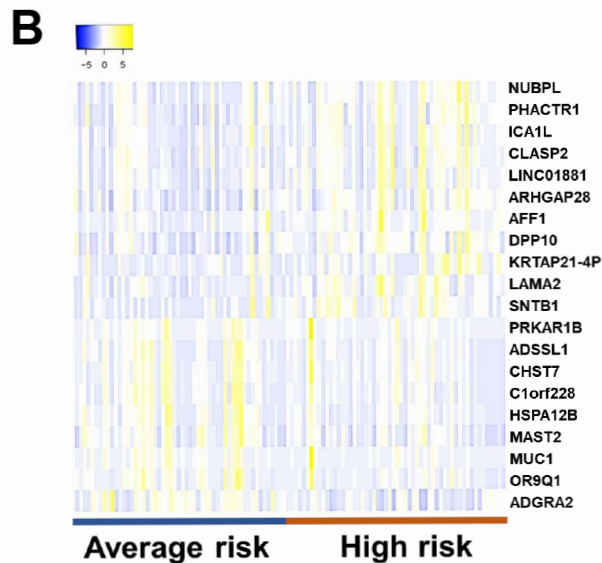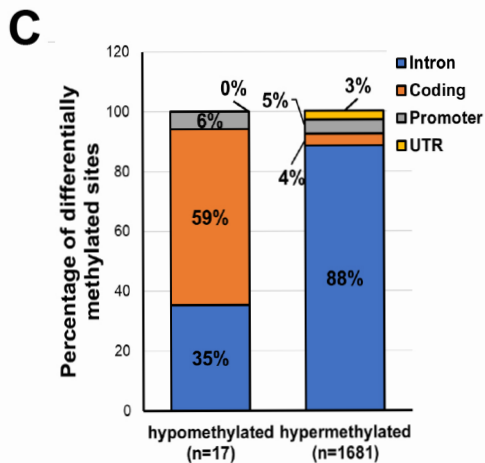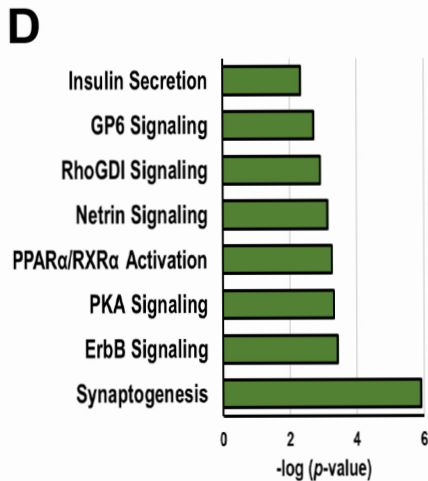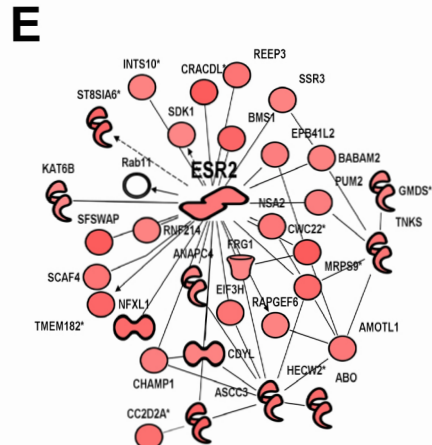

Figure 2

**A**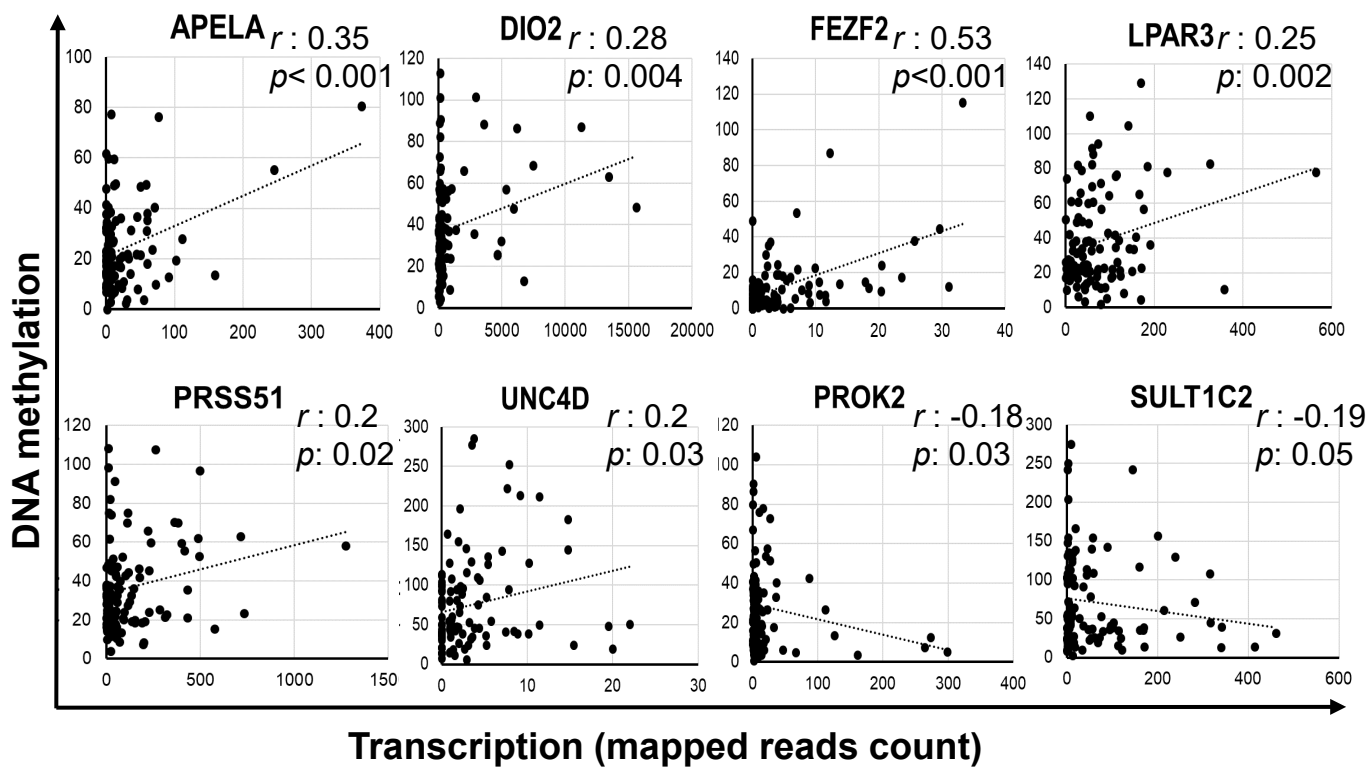**B**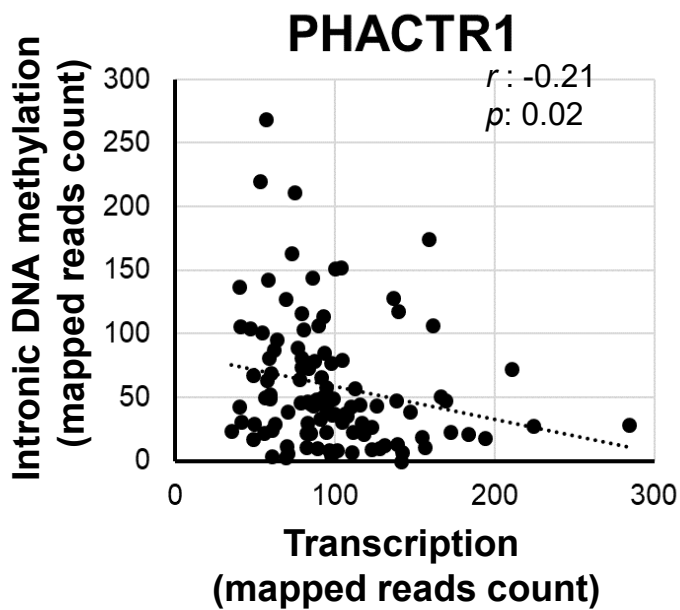

Figure 3

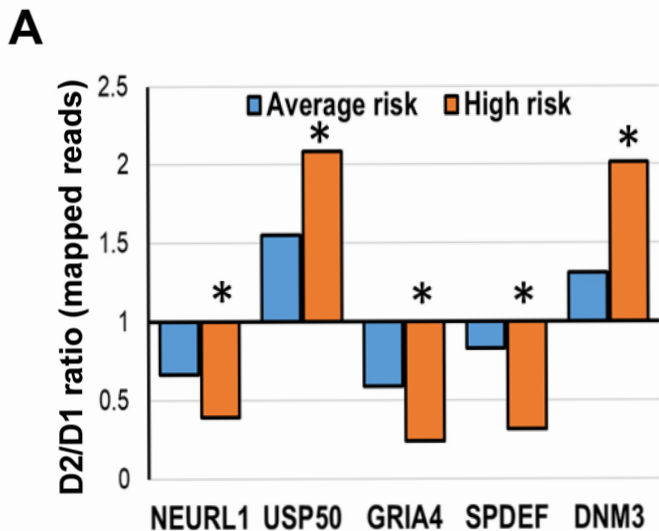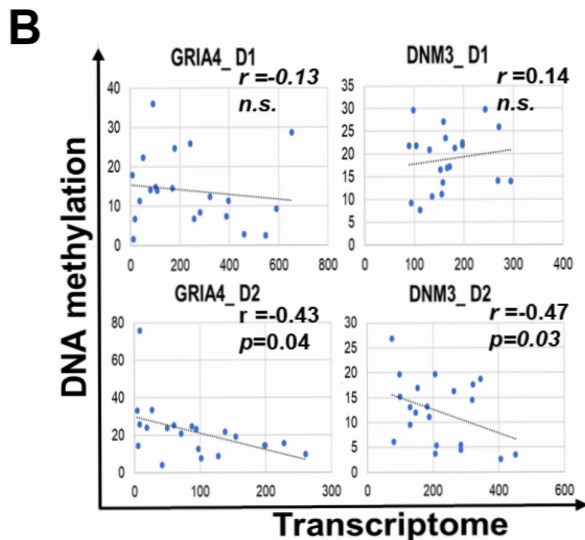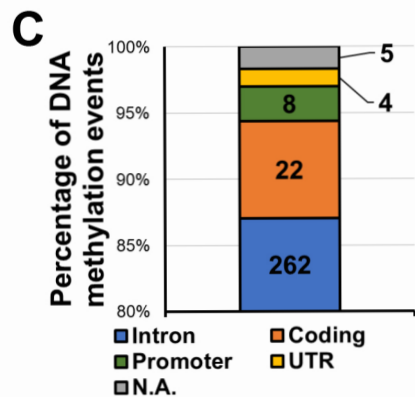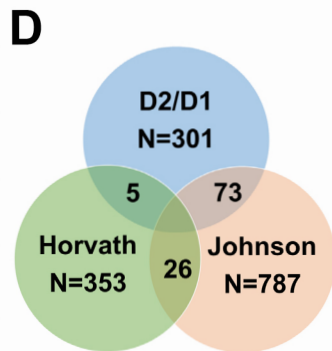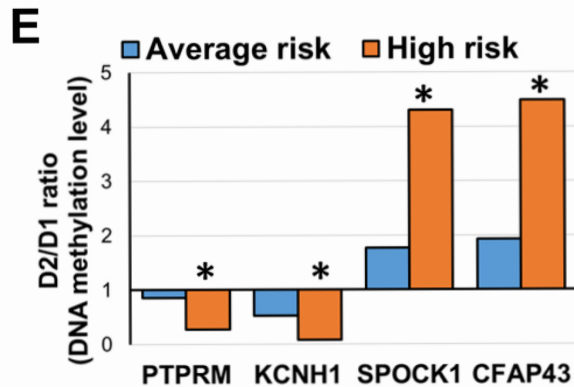

Figure 4
